# Supplementary material
Source: PubMed Central journal article supplement (PMC3517014)
Supplement: NIHMS414801-supplement-Supporting_Information.pdf [file NIHMS414801-supplement-Supporting_Information.pdf]

## Supporting Material for

### **Matrix-Assisted Dip-Pen Nanolithography (MA-DPN) and Polymer Pen Lithography (MA-PPL) \*\***

*Ling Huang, Adam B. Braunschweig, Wooyoung Shim, Lidong Qin, Jong Kuk Lim, Sarah J. Hurst, Fengwei Huo, Can Xue, Jae-Won Jang and Chad A. Mirkin\**

[\*] Prof. C. A. Mirkin, Dr. A. Braunschweig, W. Shim, Dr. L. Qin, Dr. J. K. Lim, Dr. S. J. Hurst, F. Huo, Dr. C. Xue, Dr. J. Jang  
Department of Chemistry, Department of Materials Science and Engineering,  
International Institute for Nanotechnology  
Northwestern University  
2145 Sheridan Road, Evanston, Illinois 60208-3113 (USA)  
Fax: (+1) 847-467-5123  
E-mail: chadnano@northwestern.edu

Prof. L. Huang  
School of Chemical and Biomedical Engineering, Nanyang Technological University,  
70 Nanyang Drive, Singapore 637457 Singapore

[\*\*] L. H., A. B. B. and W. S. contributed equally to this work. C.A.M. acknowledges AFOSR and DARPA-SPAWAR for support of this work. A.B.B. is grateful for an NIH Postdoctoral Fellowship.

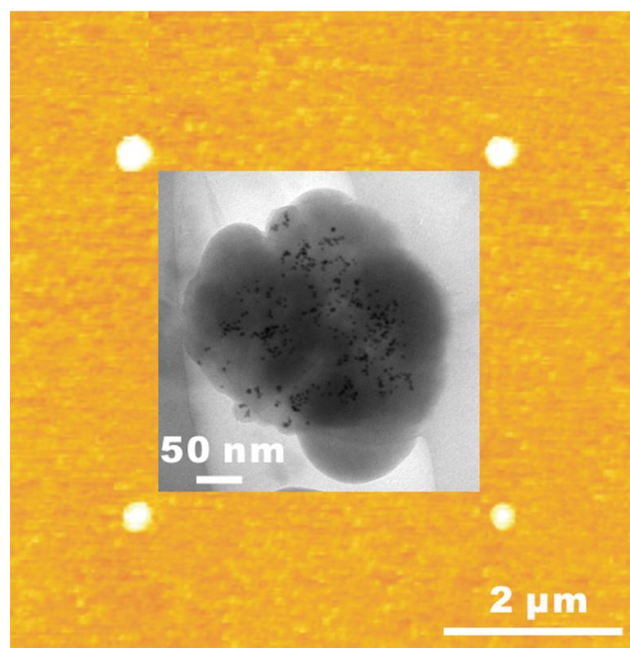

Figure S1. AFM topographical image of four AuNP-PEG dots patterned on a TEM grid. The inset is a TEM micrograph of the spot, and the dark circles are AuNPs.

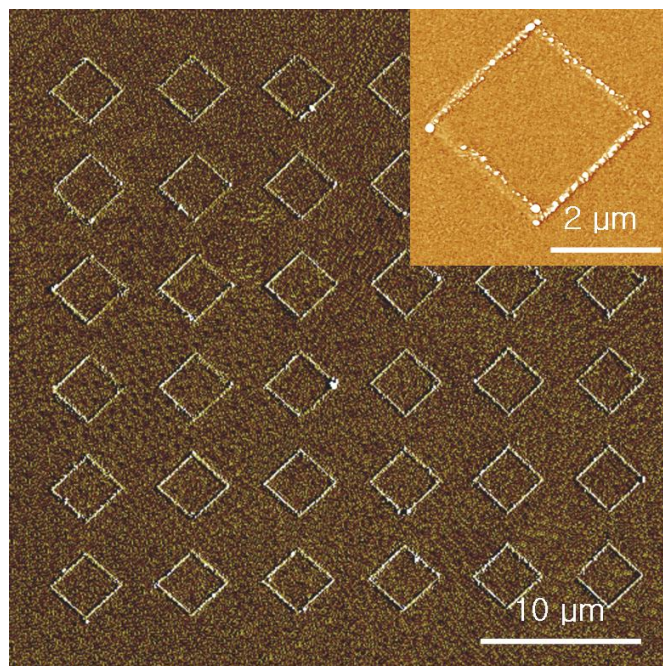

Figure S2. Magnetic force microscopy images of square patterns of PEG-Fe<sub>3</sub>O<sub>4</sub> magnetic nanoparticles patterned on a Si/SiO<sub>x</sub> surface. White indicates areas of high magnetism.

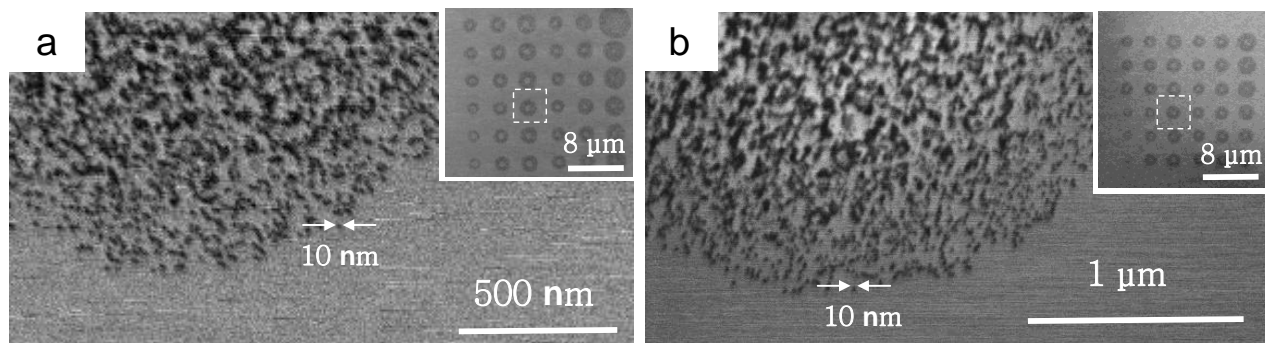

Figure S3. SEM images of Fe<sub>3</sub>O<sub>4</sub> patterned on a Si/SiO<sub>x</sub> surface by MA-DPN followed by (a) exposure to O<sub>2</sub> plasma and (b) washing with 1:1 water/ethanol. These magnified images from the patterns (dotted box in the inset) demonstrate that the Fe<sub>3</sub>O<sub>4</sub> magnetic nanoparticles are confined only to where the PEG-nanoparticle ink had been deposited.

|                      |     | HMDS          | Au            | SiO <sub>2</sub> | GaAs          |
|----------------------|-----|---------------|---------------|------------------|---------------|
| Diameter (μm)        | 1s  | 1.054 ± 0.166 | 1.068 ± 0.045 | 0.898 ± 0.039    | 1.172 ± 0.036 |
|                      | 3s  | 1.250 ± 0.110 | 1.432 ± 0.045 | 1.328 ± 0.078    | 1.484 ± 0.032 |
|                      | 10s | 1.680 ± 0.055 | 1.953 ± 0.078 | 1.927 ± 0.045    | 2.161 ± 0.090 |
| Height (μm)          | 1s  | 0.187 ± 0.035 | 0.088 ± 0.002 | 0.119 ± 0.006    | 0.132 ± 0.006 |
|                      | 3s  | 0.240 ± 0.026 | 0.122 ± 0.013 | 0.165 ± 0.007    | 0.181 ± 0.007 |
|                      | 10s | 0.331 ± 0.034 | 0.176 ± 0.007 | 0.234 ± 0.007    | 0.240 ± 0.008 |
| Average aspect ratio |     | 0.185 ± 0.008 | 0.086 ± 0.006 | 0.126 ± 0.005    | 0.115 ± 0.006 |

Table S1. Diameter, height and aspect ratio of PEG-Fe<sub>3</sub>O<sub>4</sub> magnetic nanoparticle features patterned by MA-PPL. The PEG-Fe<sub>3</sub>O<sub>4</sub> ink was deposited on Au, Si/SiO<sub>x</sub>, and GaAs surfaces as well as an HMDS coated Si/SiO<sub>x</sub> wafer.

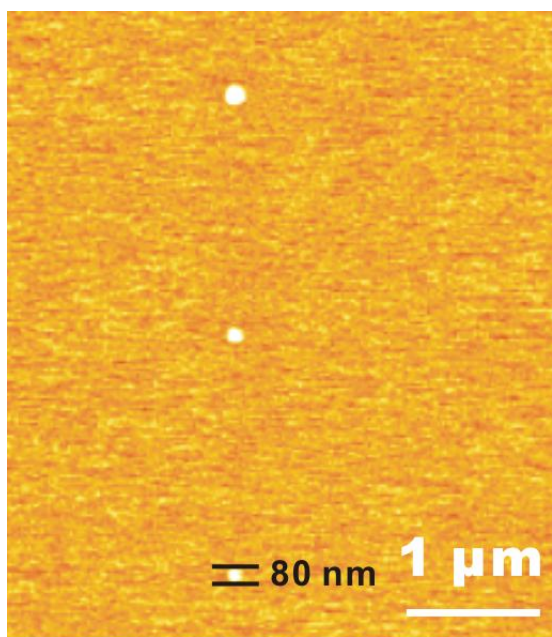

Figure S4. Topographic AFM images of C<sub>60</sub>/PEG dot array at contact times of 16, 8, and 4 s (top to bottom). Feature sizes as small as 80 nm could be obtained with a 4 s contact time at humidity of 65 %, proving that sub-100 nm features can be obtained using MA-DPN.

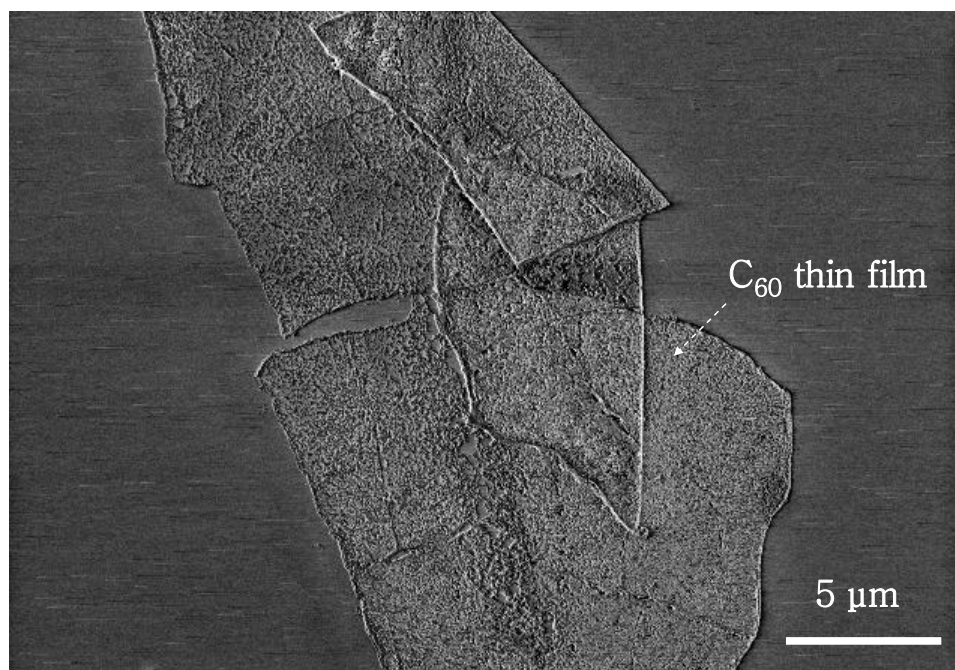

Figure S5. SEM image of C<sub>60</sub> thin films intentionally patterned in a large scale by MA-DPN on a Si/SiO<sub>x</sub> surface. The image shows that C<sub>60</sub> patterned by MA-DPN at a NM concentration of 10mg/mL is sufficient to form thin C<sub>60</sub> films after exposure to O<sub>2</sub> plasma. (Ref. W. Kratschmer *et. al.*, *Nature* **347**, 354, (1990))
